# Supplementary material for: Strain-induced bandgap engineering in CsGeX3 (X = I, Br or Cl) perovskites: insights from first-principles calculations
Source: Royal Society of Chemistry journal article supplement (doi:10.1039/d1cp05787a), 2022-01-01
Supplement: d1cp05787a1.pdf [file d1cp05787a1.pdf]

## Supplementary Information for

### Strain-induced bandgap engineering in CsGeX<sub>3</sub> (X = I, Br or Cl) perovskites: Insights from first-principle calculations

Guangbiao Xiang <sup>a</sup>, Yanwen Wu <sup>a</sup>, Man Zhang <sup>a</sup>, Jiancai Leng, <sup>\*b</sup> Chen Cheng, <sup>\*a</sup> Hong Ma, <sup>\*a</sup>

<sup>a</sup> Shandong Provincial Key Laboratory of Optics and Photonic Device, Collaborative Innovation Center of Light Manipulations and Applications, School of Physics and Electronics, Shandong Normal University, Jinan 250014, China;

<sup>b</sup> International School for Optoelectronic Engineering, Qilu University of Technology (Shandong Academy of Sciences), Jinan 250353, China

**Supplementary Table 1.** Theoretical and experimental values of lattice parameter  $a$  (Å) and unit cell volume  $V$  (Å<sup>3</sup>) of CsGeX<sub>3</sub> perovskites.

|                     | a (Å)     |                                                           |                                         | V (Å <sup>3</sup> ) |
|---------------------|-----------|-----------------------------------------------------------|-----------------------------------------|---------------------|
|                     | This Work | Other Works                                               | Experimental                            |                     |
| CsGeI <sub>3</sub>  | 5.92      | 5.99 <sup>1</sup>                                         | 5.983 <sup>1</sup>                      | 233.8               |
| CsGeBr <sub>3</sub> | 5.76      | 5.36 <sup>2</sup> , 5.64 <sup>3</sup> , 5.69 <sup>1</sup> | 5.636 <sup>1</sup> , 5.362 <sup>4</sup> | 191.6               |
| CsGeCl <sub>3</sub> | 5.53      | 5.43 <sup>3</sup> , 5.52 <sup>5</sup> , 5.51 <sup>1</sup> | 5.434 <sup>1</sup>                      | 168.9               |

**Supplementary Table 2.** Calculated electronic bandgaps (in eV), some available theoretical results and experimental optical bandgaps (in eV) of perovskites CsGeX<sub>3</sub> (X=I, Br or Cl).

| Phase               | This Work | Other Works                                                                                                                                          | Expt.             |
|---------------------|-----------|------------------------------------------------------------------------------------------------------------------------------------------------------|-------------------|
| CsGeI <sub>3</sub>  | 1.6       | 1.02 <sup>1</sup> , 1.17 (PBE) <sup>6</sup> , 1.48 (HSE) <sup>6</sup>                                                                                | 1.53 <sup>1</sup> |
| CsGeBr <sub>3</sub> | 2.13      | 0.55 (PBE) <sup>2</sup> , 4.74 (EHTB) <sup>3</sup> , 1.49 <sup>1</sup> , 1.48 (PBE) <sup>6</sup> , 1.97 (HSE) <sup>6</sup>                           | 2.32 <sup>1</sup> |
| CsGeCl <sub>3</sub> | 2.99      | 7.91 (EHTB) <sup>3</sup> , 2.11 (PBE) <sup>5</sup> , 0.82 (PBE) <sup>7</sup> , 2.26 <sup>1</sup> , 2.17 (PBE) <sup>6</sup> , 2.48 (HSE) <sup>6</sup> | 3.31 <sup>8</sup> |

**Supplementary Table 3.** Bandgaps (in eV) of CsGeX<sub>3</sub> (X=I, Br or Cl) under the triaxial strains from -4% to 4%.

| Strain<br>phase     | -4%  | -3%  | -2%  | -1%  | 0    | 1%   | 2%   | 3%   | 4%   |
|---------------------|------|------|------|------|------|------|------|------|------|
| CsGeI <sub>3</sub>  | 1.05 | 1.23 | 1.35 | 1.48 | 1.61 | 1.75 | 1.89 | 2.02 | 2.21 |
| CsGeBr <sub>3</sub> | 1.26 | 1.53 | 1.75 | 1.93 | 2.13 | 2.32 | 2.49 | 2.64 | 2.90 |
| CsGeCl <sub>3</sub> | 2.05 | 2.33 | 2.57 | 2.80 | 3.00 | 3.20 | 3.37 | 3.54 | 3.68 |

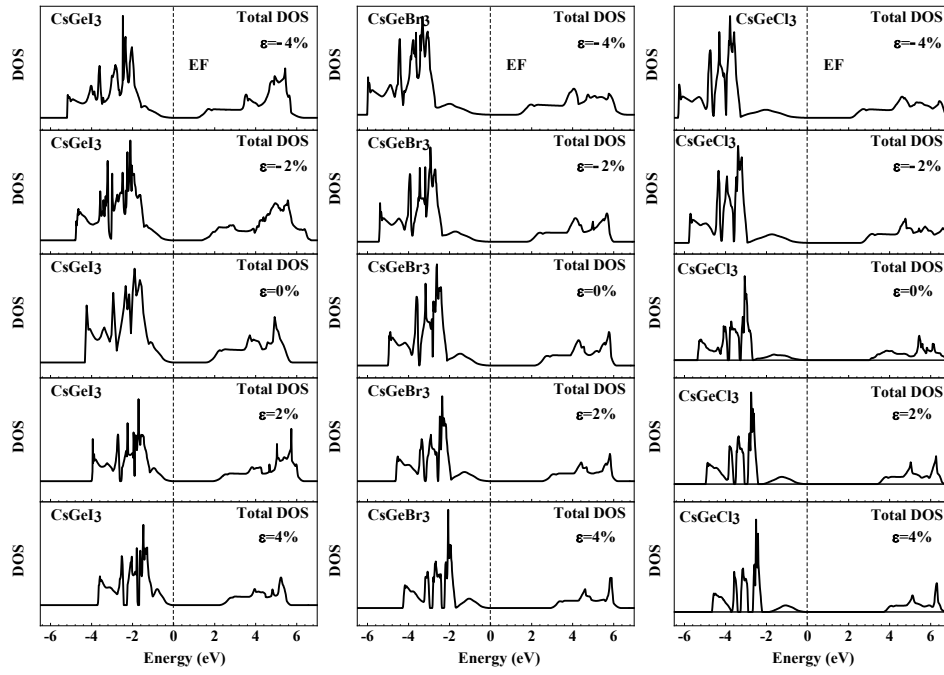

**Supplementary Figure 1:** Total densities of states of CsGeX<sub>3</sub> (X=I, Br or Cl) perovskites under different strains.

**Supplementary Table 4.** Effective masses of electron and hole of CsGeI<sub>3</sub>, CsGeBr<sub>3</sub>, and CsGeCl<sub>3</sub> under the strains.

| directions<br>strains     | electrons    |              |              | holes        |              |              |
|---------------------------|--------------|--------------|--------------|--------------|--------------|--------------|
|                           | R→Γ( $m_0$ ) | R→M( $m_0$ ) | R→X( $m_0$ ) | R→Γ( $m_0$ ) | R→M( $m_0$ ) | R→X( $m_0$ ) |
| -4% (CsGeI <sub>3</sub> ) | 0.129        | 0.898        | 0.650        | 0.131        | 0.263        | 0.168        |
| -3%(CsGeI <sub>3</sub> )  | 0.138        | 0.843        | 0.450        | 0.142        | 0.271        | 0.180        |
| -2%(CsGeI <sub>3</sub> )  | 0.148        | 0.781        | 0.342        | 0.153        | 0.276        | 0.191        |
| -1%(CsGeI <sub>3</sub> )  | 0.162        | 0.648        | 0.309        | 0.170        | 0.297        | 0.211        |
| 0%(CsGeI <sub>3</sub> )   | 0.176        | 0.633        | 0.310        | 0.186        | 0.327        | 0.233        |
| 1%(CsGeI <sub>3</sub> )   | 0.197        | 0.512        | 0.298        | 0.212        | 0.349        | 0.259        |
| 2%(CsGeI <sub>3</sub> )   | 0.218        | 0.490        | 0.307        | 0.239        | 0.384        | 0.291        |
| 3%(CsGeI <sub>3</sub> )   | 0.240        | 0.483        | 0.321        | 0.270        | 0.426        | 0.326        |
| 4%(CsGeI <sub>3</sub> )   | 0.266        | 0.478        | 0.337        | 0.318        | 0.488        | 0.381        |
| -4%(CsGeBr <sub>3</sub> ) | 0.115        | 1.184        | 1.271        | 0.112        | 0.165        | 0.134        |
| -3%(CsGeBr <sub>3</sub> ) | 0.138        | 1.070        | 0.640        | 0.138        | 0.183        | 0.152        |
| -2%(CsGeBr <sub>3</sub> ) | 0.157        | 0.791        | 0.410        | 0.159        | 0.208        | 0.175        |
| -1%(CsGeBr <sub>3</sub> ) | 0.178        | 0.614        | 0.330        | 0.181        | 0.236        | 0.200        |
| 0%(CsGeBr <sub>3</sub> )  | 0.191        | 0.561        | 0.315        | 0.197        | 0.256        | 0.218        |
| 1%(CsGeBr <sub>3</sub> )  | 0.227        | 0.548        | 0.332        | 0.237        | 0.305        | 0.262        |
| 2%(CsGeBr <sub>3</sub> )  | 0.254        | 0.537        | 0.345        | 0.269        | 0.344        | 0.297        |
| 3%(CsGeBr <sub>3</sub> )  | 0.280        | 0.528        | 0.364        | 0.302        | 0.386        | 0.334        |
| 4%(CsGeBr <sub>3</sub> )  | 0.316        | 0.522        | 0.421        | 0.357        | 0.453        | 0.394        |
| -4%(CsGeCl <sub>3</sub> ) | 0.361        | 1.025        | 0.931        | 0.183        | 0.217        | 0.194        |
| -3%(CsGeCl <sub>3</sub> ) | 0.380        | 1.053        | 1.007        | 0.210        | 0.250        | 0.224        |
| -2%(CsGeCl <sub>3</sub> ) | 0.404        | 1.109        | 1.113        | 0.239        | 0.283        | 0.254        |
| -1%(CsGeCl <sub>3</sub> ) | 0.421        | 1.143        | 1.207        | 0.270        | 0.318        | 0.286        |
| 0%(CsGeCl <sub>3</sub> )  | 0.450        | 1.191        | 1.092        | 0.300        | 0.354        | 0.320        |
| 1%(CsGeCl <sub>3</sub> )  | 0.487        | 1.204        | 1.327        | 0.333        | 0.393        | 0.355        |
| 2%(CsGeCl <sub>3</sub> )  | 0.488        | 1.237        | 1.085        | 0.385        | 0.454        | 0.411        |
| 3%(CsGeCl <sub>3</sub> )  | 0.514        | 1.289        | 1.068        | 0.426        | 0.501        | 0.455        |
| 4%(CsGeCl <sub>3</sub> )  | 0.537        | 1.335        | 1.119        | 0.472        | 0.557        | 0.507        |

1. L. Tang, Y. Chang and J. Huang, *Jpn J Appl Phys*, 2009, **48**, 112402.
2. M. G. Brik, *Solid State Commun*, 2011, **151**, 1733–1738.
3. D.-K. Seo, N. Gupta and M. H. Whangbo, *Inorg. Chem.*, 1998, **37**, 407–410.
4. Z. Lin, L. Tang and C. Chou, *Journal of Crystal Growth*, 2008, **310**, 3224–3229.
5. D. Huang, Y. Zhao and Z. Ju, *Appl. Phys. Express*, 2014, **7**, 041201.
6. S. Körbel, M. A. L. Marques and S. Botti, *J. Mater. Chem. C*, 2016, **4**, 3157–3167.
7. S.B. Erdinca, M. N. Secuka and M. Aycibin, *Ferroelectrics*, 2016, **494**, 138–149.
8. J. Qian, B. Xu and W. Tian, *Organic Electronics*, 2016, **37**, 61–73.
